# Supplementary material
Source: PubMed Central journal article supplement (PMC2791627)
Supplement: 0904706106_0904706106SI.pdf [file 0904706106_0904706106SI.pdf]

# Supporting Information

Roy et al. 10.1073/pnas.0904706106

## SI Materials and Methods

**Procedure. Prescanning session.** Before the scanning session, participants performed the experiment once outside the scanner to familiarize themselves with the procedure. The same pictures were used in the prescanning and scanning sessions. Global valence and arousal ratings were obtained after each block of pictures only in the prescan session.

**Orders of presentation.** Each scan started with two control trials with only the fixation point. These trials controlled for potential habituation effects, allowing the RIII reflex to stabilize. After these two trials, the remaining 24 trials were presented in a pseudorandom order counterbalanced within and between subjects, consisting of six consecutive cycles, comprising each of the four experimental conditions (unpleasant, pleasant, neutral, or

fixation). These cycles were ordered so that no experimental condition was presented twice consecutively. Two orders of presentation were created (order 2 being the inverse of order 1). The presentation of these two orders within a scanning session was counterbalanced across individuals.

**Functional MRI Data Analyses.** Imaging data were analyzed using SPM2 ([www.fil.ion.ucl.ac.uk/spm/](http://www.fil.ion.ucl.ac.uk/spm/)) for the preprocessing and SPM5 for the functional analyses. Preprocessing included slice-time correction and realignment. Anatomical and functional images were then spatially normalized to a standard stereotaxic space using the Montreal Neurological Institute (MNI) template. Subsequently, functional images were spatially smoothed using a Gaussian kernel of twice the voxel size (FWHM:  $7 \times 7 \times 10$  mm).

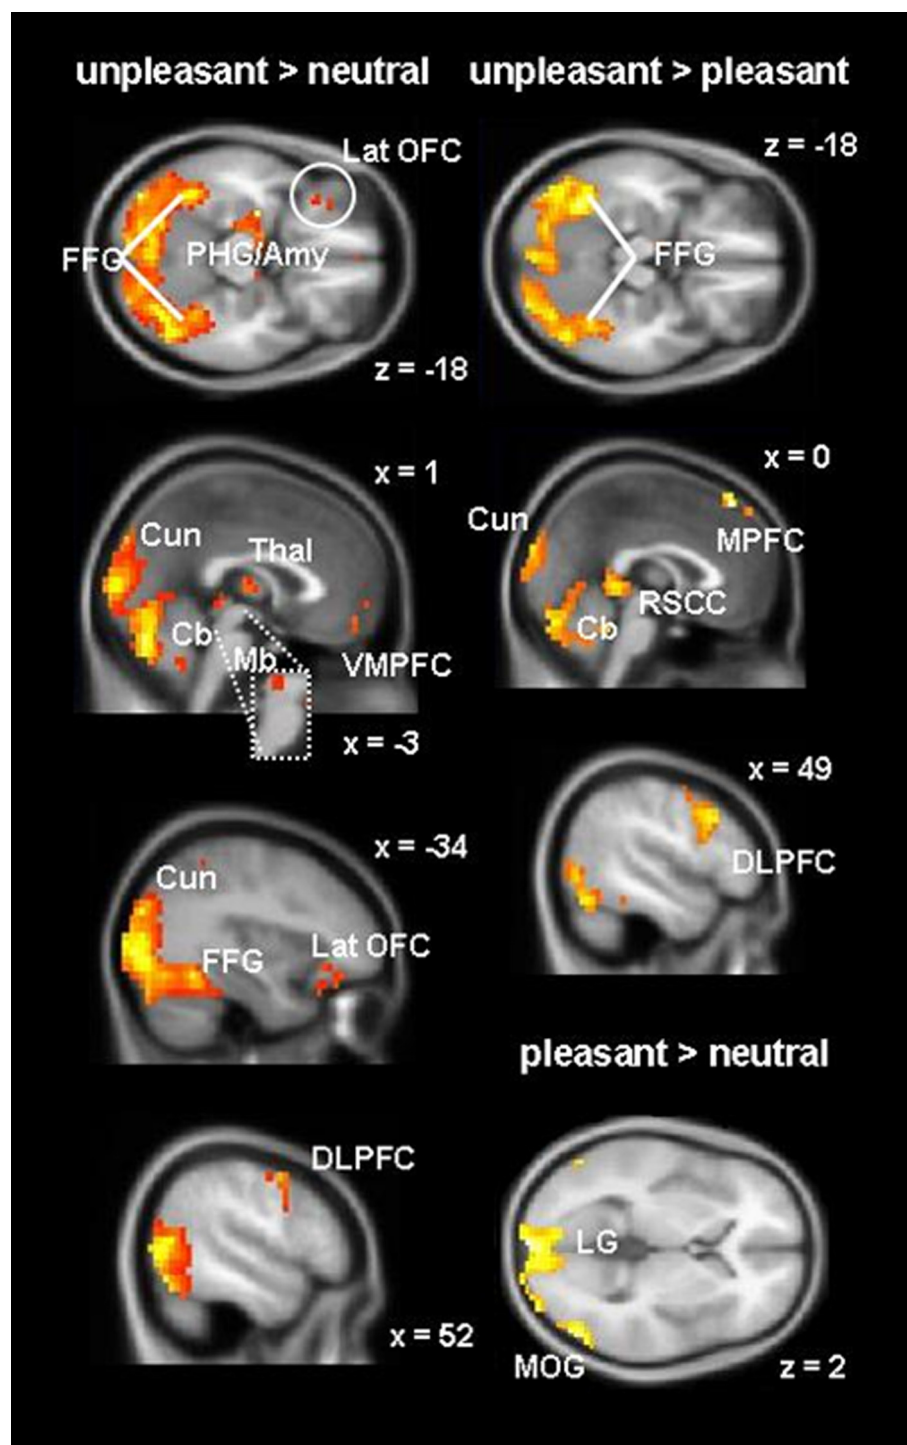

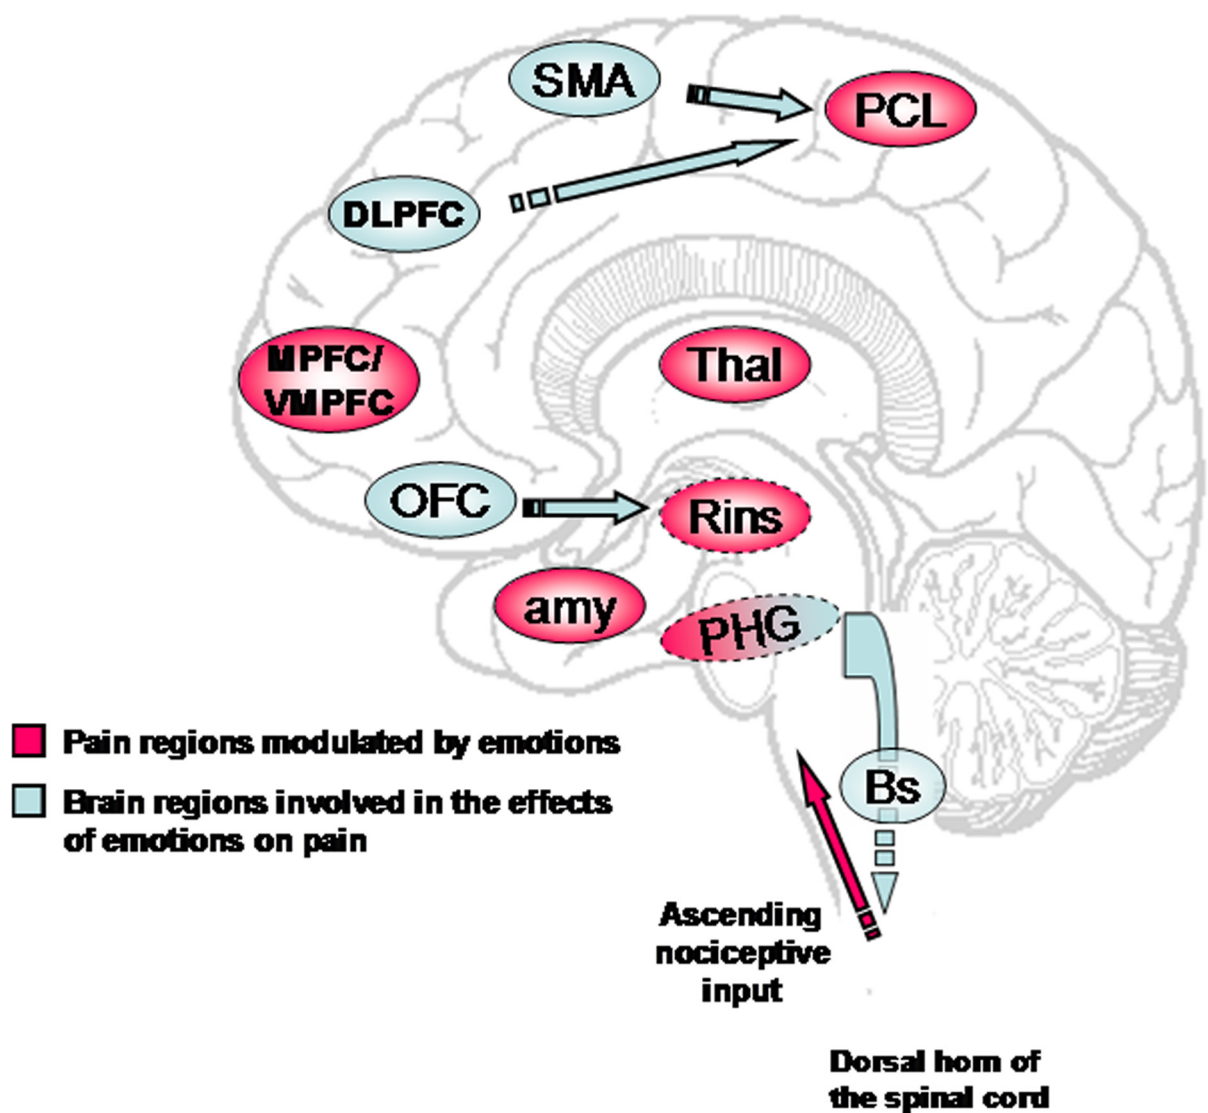

**Fig. S2.** Brain regions involved in the emotional modulation of pain in this study. Regions in red reflect pain-related activations that were higher in the context of unpleasant vs. pleasant pictures. Regions in blue were identified as possible mediators of the effects of emotions on pain by the psychophysiological interaction (PPI) analysis and by the picture blocks analyses. Blue arrows indicate possible corticocortical and descending modulatory pathways. Note that this figure only summarizes the results and that additional regions might also be involved in the emotional modulation of pain. Bs, brainstem; Rins, right insula; SMA, supplementary motor area.

**Table S1. Brain activation peaks related to the painful stimulations and pictures**

| Region of activation                 | BA      | Side* | <i>t</i> | <i>x, y, z**</i> |
|--------------------------------------|---------|-------|----------|------------------|
| <b>Electrical stimulations</b>       |         |       |          |                  |
| Postcentral gyrus/Paracentral lobule | 1–3, 5  | L     | 8.20     | –7, –41, 75      |
| Precuneus/Postcentral gyrus          | 1–3/5/7 | R     | 7.18     | 7, –48, 75       |
| Precentral gyrus/SMA                 | 4/6     | L     | 10.40    | –7, –13, 80      |
| Cingulate cortex                     |         |       |          |                  |
| Anterior                             | 24      | L     | 12.47    | 7, 24, 40        |
| Mid                                  | 24      | L     | 6.44     | –7, –3, 40       |
| Dorsal                               | 32      | L     | 13.73    | –3, 14, 50       |
| Insula                               | —       | L     | 11.67    | –34, 17, 0       |
|                                      | —       | R     | 10.91    | 38, 14, 0        |
| Parietal operculum                   | 40      | L     | 10.73    | –55, –24, 20     |
|                                      | 40      | R     | 8.77     | 69, –24, 20      |
| Parahippocapal gyrus                 | 28/35   | L     | 6.22     | –28, –28, –5     |
|                                      |         | R     | 6.30     | 21, –21, –10     |
| Inferior frontal gyrus               | 45      | R     | 10.18    | 41, 38, 5        |
| Middle frontal gyrus                 | 10/11   | L     | 7.61     | –41, 45, 20      |
|                                      |         | R     | 11.22    | 38, 42, 30       |
| Medial orbitofrontal gyrus           | 25      | L     | 8.68     | –21, 21, –15     |
|                                      |         | R     | 11.51    | 13, 7, –10       |
| Thalamus                             | —       | L     | 5.68     | 10, 0, 0         |
|                                      | —       | R     | 6.46     | –10, 0, 0        |
| Hypothalamus                         | —       | —     | 6.32     | –7, –10, –15     |
| Pons                                 | —       | R     | 7.30     | 3, –38, –30      |
| Cerebellum                           |         |       |          |                  |
| Culmen                               | —       | L     | 8.20     | 3, –58, –5       |
| Uvula of vermis                      | —       | —     | 9.58     | 3, –83, –25      |
| Tonsils                              | —       | L     | 9.86     | –31, –52, –45    |
|                                      | —       | R     | 6.06     | 28, –41, –50     |
| <b>Pictures</b>                      |         |       |          |                  |
| Inferior occipital gyrus             | 18      | L     | 9.55     | –31, –86, –10    |
|                                      | 18      | R     | 6.24     | 34, –86, 0       |
| Fusiform gyrus                       |         | L     | 6.80     | –31, –61, –10    |
|                                      |         | R     | 7.37     | 34, –65, –15     |

Peaks of activity thresholded at  $P < 0.05$  corrected for multiple comparisons for the global search volume (626.38 resels), using random field theory (RFT).

\*R, right ipsilateral side; L, left contralateral side.

\*\*Coordinates are reported in MNI space.

**Table S2. Shock-related activations modulated by pleasant and unpleasant vs. neutral pictures**

| Region of activation                       | BA    | Side* | t    | x, y, z**     |
|--------------------------------------------|-------|-------|------|---------------|
| Pain during unpleasant > pleasant pictures |       |       |      |               |
| Insula                                     | —     | R     | 4.26 | 34, 7, 10     |
| Paracentral lobule                         | 5/6   | —     | 5.28 | 0, -24, 60    |
| Parahippocampal gyrus                      | 28/35 | L     | 4.92 | 28, -34, -20  |
|                                            | 28/35 | R     | 4.15 | -24, -45, -15 |
| Lingual gyrus                              | 17    | R     | 5.02 | 14, -89, 0    |
| Pain during unpleasant > neutral pictures  |       |       |      |               |
| Superior frontal gyrus                     | 8     | R     | 6.47 | -17, 58, 25   |
| Dorsolateral prefrontal gyrus              | 10    | R     | 5.07 | -45, 14, 45   |
| Pain during neutral > pleasant pictures    |       |       |      |               |
| Parahippocampal gyrus                      | 28/35 | L     | 8.94 | -24, -45, -5  |
|                                            | 28/35 | R     | 4.42 | 28, -34, -20  |
| Cuneus                                     | 18    | L     | 5.50 | -10, -103, 15 |

A priori regions are thresholded at  $P < 0.05$  corrected for multiple comparisons using RFT (pain directed search volume = 109.58 resels). Other regions are thresholded at  $P < 0.05$ , corrected for multiple comparisons using RFT (global search volume = 626.38 resels).

\*R, right ipsilateral side; L, left contralateral side.

\*\*Coordinates are reported in MNI space.

| Region of activation                     | BA    | Side* | t       | x, y, z**     |
|------------------------------------------|-------|-------|---------|---------------|
| Correlation with pain ratings modulation |       |       |         |               |
| Insula                                   | —     | R     | 4.47    | 45, 17, −5    |
| Medial prefrontal cortex                 | 10    | L     | 3.96*** | −14, 48, 0    |
| Lingual gyrus                            | 17    | L     | 6.88    | −10, −86, 0   |
|                                          | 17    | R     | 4.40    | 14, −96, −5   |
| Cerebellar nodule                        | —     | L     | 4.56    | −10, −62, −20 |
| Correlation with RIII reflex modulation  |       |       |         |               |
| Medial thalamus                          | —     | L     | 6.95    | −7, −17, 10   |
| Amygdala                                 | —     | L     | 6.78    | −17, −7, −20  |
|                                          | —     | R     | 7.95    | 21, −10, −30  |
| Brainstem                                | —     | L     | 5.31    | −10, −21, −25 |
| Perigenual cingulate                     | 25    | L     | 5.27    | −7, 28, −15   |
| Ventromedial prefrontal cortex           | 10/11 | R     | 4.24    | 3, 51, −15    |
| Medial prefrontal cortex                 | 10    | L     | 4.59    | −14, 58, 5    |
| Dorsolateral prefrontal cortex           | 9     | L     | 6.45    | −55, 14, 35   |
| Postcentral gyrus                        | 2     | L     | 5.55    | −58, −28, 50  |
| Cerebellar nodule                        | —     | L     | 4.85    | −7, −62, −30  |
| Superior occipital gyrus                 | 19    | L     | 6.85    | −38, −89, 25  |
|                                          | 19    | R     | 5.66    | 31, −83, 45   |

A priori regions are thresholded at  $P < 0.05$  corrected for multiple comparisons using RFT (pain-directed search volume = 109.58 resels). Other regions are thresholded at  $P < 0.05$ , corrected for multiple comparisons using RFT (global search volume = 626.38 resels).

\*R, right ipsilateral side; L, left contralateral side.

\*\*Coordinates are reported in MNI space.

\*\*\* $P < 0.005$ , uncorrected.

Table S4. Brain activation to pleasant and unpleasant pictures

| Region of activation           | BA       | Side** | Unpleasant vs. neutral pictures |                   | Pleasant vs. neutral pictures |                   | Unpleasant vs. pleasant pictures* |                   |
|--------------------------------|----------|--------|---------------------------------|-------------------|-------------------------------|-------------------|-----------------------------------|-------------------|
|                                |          |        | <i>t</i>                        | <i>x, y, z***</i> | <i>t</i>                      | <i>x, y, z***</i> | <i>t</i>                          | <i>x, y, z***</i> |
| Cuneus                         | 18       | L      | 8.17                            | −14, −100, 15     | —                             | —                 | —                                 | —                 |
|                                | 18/19    | R      | 8.61                            | 14, −100, 20      | 5.32                          | 17, −100, 25      | 4.56                              | 3, −100, 10       |
| Lingual gyrus                  | 17/18    | R      | —                               | —                 | 4.99                          | 3, −90, 5         | —                                 | —                 |
| Middle occipital gyrus         | 19       | L      | 8.78                            | −48, −82, 0       | 5.25                          | −52, −69, 5       | 6.97                              | −48, −83, −5      |
|                                | 19       | R      | 8.90                            | 41, −79, 5        | 5.06                          | 55, −72, 0        | 4.56                              | 52, −72, −5       |
| Fusiform gyrus                 | 37       | L      | 7.66                            | −38, −55, −15     | —                             | —                 | 6.55                              | −34, −58, −20     |
|                                | 37       | R      | 8.66                            | 48, −62, −25      | —                             | —                 | 5.32                              | 38, −52, −15      |
| Superior parietal lobule       | 7        | L      | 4.77                            | −24, −58, 70      | —                             | —                 | 3.79                              | −31, −65, 60      |
|                                | 7        | R      | 4.80                            | 28, −55, 55       | —                             | —                 | —                                 | —                 |
| Retrosplenial cortex           | 26/29–30 | R      | —                               | —                 | —                             | —                 | 5.49                              | 3 −41, 0          |
| Thalamus                       | —        | —      | 4.31                            | 0, −17, 10        | —                             | —                 | —                                 | —                 |
| Thalamus/Pulvinar              | —        | R      | 4.89                            | 17, −27, 0        | —                             | —                 | —                                 | —                 |
| Amygdala                       | —        | L      | 4.93                            | −17, −7, −25      | —                             | —                 | 3.22                              | −10, −10, −20     |
|                                | —        | R      | 3.84****                        | 24, −7, −20       | —                             | —                 | —                                 | —                 |
| Parahippocampal gyrus          | 28/35    | L      | 4.59                            | −17, −17, −20     | —                             | —                 | —                                 | —                 |
|                                | 28/35    | R      | 4.02****                        | 28, −28, −5       | —                             | —                 | —                                 | —                 |
| Orbitofrontal cortex           | 47       | L      | 4.73                            | −38, 24, −25      | —                             | —                 | —                                 | —                 |
| Middle temporal gyrus          | —        | —      | —                               | —                 | —                             | —                 | 4.13                              | 58, −38, −10      |
| Ventromedial prefrontal cortex | 10/11    | —      | 4.06                            | 0, 52, −15        | —                             | —                 | —                                 | —                 |
| Medial prefrontal cortex       | 8        | —      | —                               | —                 | —                             | —                 | 6.84                              | 0, 38, 55         |
| Premotor cortex                | 6/8      | R      | 5.22                            | 52, 3, 50         | —                             | —                 | —                                 | —                 |
| Midbrain                       | —        | R      | 4.79                            | 3, −31, −5        | —                             | —                 | —                                 | —                 |
| Cerebellum                     |          |        |                                 |                   |                               |                   |                                   |                   |
| Culmen                         | —        | L      | —                               | —                 | —                             | —                 | —                                 | —                 |
|                                | —        | R      | —                               | —                 | —                             | —                 | —                                 | —                 |
| Nodule                         | —        | —      | —                               | —                 | —                             | —                 | 4.30                              | 0, −45, −30       |
| Tuber of vermis                | —        | R      | 7.87                            | 0, −79, −30       | —                             | —                 | 4.95                              | −3, −86, −25      |
| Declive                        | —        | —      | —                               | —                 | —                             | —                 | 5.76                              | −45, −72, −25     |
| Pyramis                        | —        | L      | —                               | —                 | —                             | —                 | 5.36                              | −14, −76, −50     |
|                                | —        | R      | —                               | —                 | —                             | —                 | 5.15                              | 10, −79, −45      |

Peaks of activity thresholded at  $P < 0.05$  corrected for multiple comparisons for the pictures-directed search volume (153.12 resels), using RFT. Peaks of activity falling out of a priori defined regions are thresholded at  $P < 0.05$  corrected for multiple comparisons for the global search volume (626.38 resels).

\*There were no significant peaks for the pleasant vs. unpleasant contrast.

\*\*R, right ipsilateral side; L, left contralateral side.

\*\*\*Coordinates are reported in MNI space.

\*\*\*\* $P < 0.005$ , uncorrected.

| Region of activation                                                                               | BA    | Side* | <i>t</i> | <i>x</i> , <i>y</i> , <i>z</i> ** |
|----------------------------------------------------------------------------------------------------|-------|-------|----------|-----------------------------------|
| Regions correlating with the effects of unpleasant vs. pleasant pictures on the right insula       |       |       |          |                                   |
| Tail of caudate/lateral geniculate body of thalamus                                                | —     | L     | 4.12     | −24, −28, 5                       |
| Orbitofrontal cortex                                                                               | 11    | R     | 3.74***  | 21, 41, −15                       |
| Subgenual cingulate cortex                                                                         | 25    | —     | 3.22***  | 0 10, −10                         |
| Middle occipital gyrus                                                                             | 19    | L     | 4.49     | −17, −103, 20                     |
|                                                                                                    | 19    | R     | 5.13     | 28, −96, 20                       |
| Regions correlating with the effects of unpleasant vs. pleasant pictures on the paracentral lobule |       |       |          |                                   |
| Thalamus                                                                                           | —     | L     | 3.40***  | −3, −21, 15                       |
| Brainstem                                                                                          | —     | —     | 3.41***  | 3, −38, −50                       |
| Tail of caudate/lateral geniculate body of thalamus                                                | —     | L     | 4.42     | −24, −28, 0                       |
| Dorsolateral prefrontal cortex                                                                     | 45    | L     | 4.66     | −55, 28, 15                       |
| Supplementary motor area                                                                           | 6     | L     | 4.65     | −7, −17, 80                       |
| Parahippocampal gyrus                                                                              | 28/35 | L     | 3.80***  | −21, −31, −20                     |
|                                                                                                    | 28/35 | R     | 3.74***  | 21, −59, −10                      |
| Fusiform gyrus                                                                                     | 18    | L     | 4.11     | −24, −72, −15                     |
|                                                                                                    | 18    | R     | 5.01     | 34, −65, −20                      |
| Cuneus                                                                                             | 18    | L     | 7.56     | −24, −103, 10                     |
|                                                                                                    | 18    | R     | 4.88     | 7, −100, 5                        |

A priori regions are thresholded at  $P < 0.05$  corrected for multiple comparisons using RFT (pain-directed search volume = 109.58 resels). Other regions are thresholded at  $P < 0.05$ , corrected for multiple comparisons using RFT (global search volume = 626.38 resels).

\*R, right ipsilateral side; L, left contralateral side.

\*\*Coordinates are reported in MNI space.

\*\*\* $P < 0.005$ , uncorrected.

|         | SAM ratings under experimental conditions |                     |                     |                     |
|---------|-------------------------------------------|---------------------|---------------------|---------------------|
|         | Pleasant                                  | Unpleasant          | Neutral             | No picture          |
| Valence | 7.38 ( $\pm 0.96$ )                       | 2.07 ( $\pm 0.68$ ) | 4.86 ( $\pm 0.86$ ) | 4.83 ( $\pm 0.85$ ) |
| Arousal | 5.56 ( $\pm 0.94$ )                       | 6.29 ( $\pm 1.37$ ) | 2.83 ( $\pm 1.30$ ) | 2.36 ( $\pm 1.66$ ) |

Recorded using a computerized version of the self-assessment manikin (1). Valence: 1, unpleasant; 9, pleasant; arousal: 1, low arousal; 9, high arousal.
